# Supplementary material for: Identification of Germline Variants in Patients with Hereditary Cancer Syndromes in Northeast Mexico
Source: MDPI journal article supplement (doi:10.3390/genes14020341), 2023-01-28
Supplement: s1 [file s1]

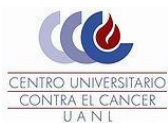

HOSPITAL UNIVERSITARIO JOSÉ ELEUTERIO GONZALEZ  
CENTRO UNIVERSITARIO CONTRA EL CÁNCER  
SERVICIO DE ONCOLOGÍA  
GENETIC REFERENCE SURVEY

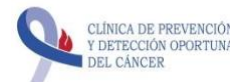

Date: \_\_\_\_\_ Register #: \_\_\_\_\_

Name: \_\_\_\_\_

Cancer type and clinical staging: \_\_\_\_\_

- |                                                                                                                                  | yes/no |
|----------------------------------------------------------------------------------------------------------------------------------|--------|
| • Two or more cancer cases in one family side                                                                                    | [ ]    |
| • More than one relative with cancer in two generations (on one family side)                                                     | [ ]    |
| • Early onset (cancer under 40 years)                                                                                            | [ ]    |
| • Multiple primary tumors ( $\geq 2$ ) in the patient                                                                            | [ ]    |
| • Bilateral cancer (Ex: Breast, ovarian) or Multifocal (Ex: $\geq 2$ tumors in the same organ)                                   | [ ]    |
| • Rare tumors                                                                                                                    | [ ]    |
| • Cancer patient with a birth defect (Short or tall stature, segmental overgrowth, macro or microcephaly, cleft lip-palate etc.) | [ ]    |
| • Ovarian cancer                                                                                                                 | [ ]    |
| • Triple negative breast cancer                                                                                                  | [ ]    |
| • Familial Adenomatous Polyposis                                                                                                 | [ ]    |
| • Multiglandular disease (Ex. Thyroid, Parathyroid, adrenal gland)                                                               | [ ]    |
| • Primary Hyperthyroidism                                                                                                        | [ ]    |
| • Medullary Thyroid cancer                                                                                                       | [ ]    |
| • Hemangioblastoma (Benign vascular lesion)                                                                                      | [ ]    |
| • Clear cell renal cancer                                                                                                        | [ ]    |
| • Diagnosed with hereditary cancer                                                                                               | [ ]    |

**IN CASE OF ONE OR MORE "YES", PLEASE SEND THE PATIENT TO GENETIC COUNSELING**
